# Supplementary material for: Application of Asymmetrical Flow Field-Flow Fractionation for Characterizing the Size and Drug Release Kinetics of Theranostic Lipid Nanovesicles
Source: MDPI journal article supplement (doi:10.3390/ijms221910456), 2021-09-28
Supplement: s1 [file s1]

# SUPPLEMENTARY MATERIAL

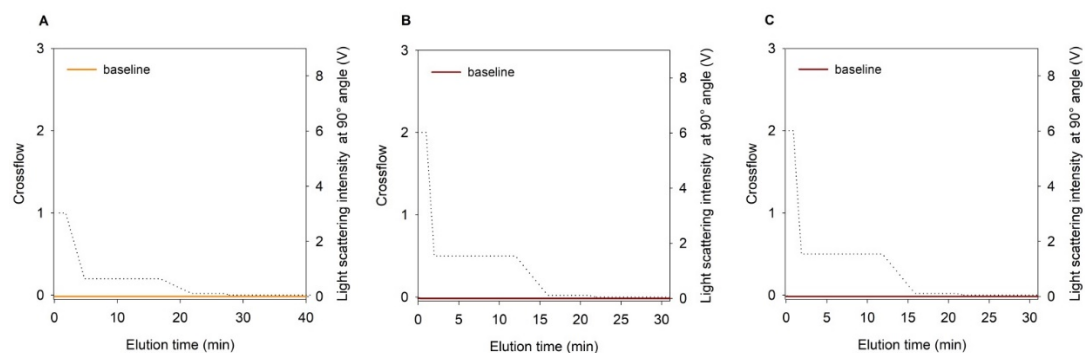

Figure S1 Baselines registered for blank injection of TRIS buffer under flow conditions (crossflow – dotted black line) used to separate donor and acceptor fractions: A - F4M1, B - F4M2, C – F5M2.

Table S1 Detailed results of size measurements of studied donor liposomes and acceptor vesicles by AF4/MALLS and DLS

| Sample name                                                 | AF4/MALLS            |                      |                      |                     |                      |                      |                      |                     | DLS                     |               |       |                    |               |       |                      |             |
|-------------------------------------------------------------|----------------------|----------------------|----------------------|---------------------|----------------------|----------------------|----------------------|---------------------|-------------------------|---------------|-------|--------------------|---------------|-------|----------------------|-------------|
|                                                             | Peak 1               |                      |                      |                     | Peak 2               |                      |                      |                     | Regularization analysis |               |       |                    |               |       | Cumulants            |             |
|                                                             |                      |                      |                      |                     |                      |                      |                      |                     | Peak 1                  |               |       | Peak 2             |               |       | Z <sub>av</sub> (nm) | PDI         |
|                                                             | D <sub>10</sub> [nm] | D <sub>50</sub> [nm] | D <sub>90</sub> [nm] | D <sub>z</sub> [nm] | D <sub>10</sub> [nm] | D <sub>50</sub> [nm] | D <sub>90</sub> [nm] | D <sub>z</sub> [nm] | Peak (nm)               | Intensity (%) | PD(%) | Peak (nm)          | Intensity (%) | PD(%) |                      |             |
| Method 1: TLH + extrusion                                   |                      |                      |                      |                     |                      |                      |                      |                     |                         |               |       |                    |               |       |                      |             |
| F4M1                                                        | 56.8±4.3             | 62.6±3.9             | 72.5±5.1             | 67.1±5.1            | 98.5±15.1            | 124.5±12.9           | 148.3±13.7           | 123.2±7.4           | 64.5                    | 100.0         | 25.2  | no peak identified |               |       | 58.8±0.5             | 0.084±0.020 |
| Method 2: microfluidic FRR 3:1, TFR 12 mL min <sup>-1</sup> |                      |                      |                      |                     |                      |                      |                      |                     |                         |               |       |                    |               |       |                      |             |
| F4M2                                                        | 27.1±4.8             | 45.3±6.7             | 58.9±3.5             | 12.7±1.8            | 153.9±1.5            | 189.3±0.6            | 212.5±6.4            | 196.9±5.6           | 20.2                    | 80.9          | 6.2   | 61.4               | 13.1          | 11.5  | 24.2±0.3             | 0.235±0.002 |
| F5M2                                                        | 18.2±1.1             | 29.2±8.7             | 30.8±7.6             | 24.5±2.4            | 135.3±5.8            | 182.9±0.7            | 201.7±1.8            | 185.9±0.7           | 28.9                    | 93.0          | 22.9  | 297.3              | 7.0           | 16.9  | 32.8±0.4             | 0.164±0.016 |
| Method 3: microfluidic FRR 5:1, TFR 12 mL min <sup>-1</sup> |                      |                      |                      |                     |                      |                      |                      |                     |                         |               |       |                    |               |       |                      |             |
| F4M3                                                        | 30.3±1.6             | 36.9±1.0             | 49.5±11.7            | 23.7±0.4            | no peak identified   |                      |                      |                     | 20.3                    | 91.6          | 5.6   | 104.9              | 8.4           | 8.1   | 22.1±0.4             | 0.175±0.018 |
| Method 4: microfluidic FRR 3:1, TFR 8 mL min <sup>-1</sup>  |                      |                      |                      |                     |                      |                      |                      |                     |                         |               |       |                    |               |       |                      |             |
| F4M4                                                        | 21.2±0.4             | 36.9±0.4             | 52.2±0.9             | 31.0±3.1            | no peak identified   |                      |                      |                     | 29.2                    | 92.2          | 29.7  | 153.7              | 7.8           | 22.1  | 28.1±0.3             | 0.163±0.016 |
| Method: TLH+ freeze-thawing                                 |                      |                      |                      |                     |                      |                      |                      |                     |                         |               |       |                    |               |       |                      |             |
| Acceptor (hollow-sphere model)                              | 193.5±8.9            | 210.9±5.0            | 223.7±3.3            | 219.1±3.9           | no peak identified   |                      |                      |                     | 49.4                    | 0.6           | 4.4   | 319.2              | 98.3          | 16.3  | 302.9±16.7           | 0.111±0.023 |
| Acceptor (solid-sphere model)                               | 237.2±3.2            | 257.0±1.3            | 276.8±2.5            | 276.2±0.8           | no peak identified   |                      |                      |                     |                         |               |       |                    |               |       |                      |             |
